# Supplementary material
Source: PubMed Central journal article supplement (PMC5656243)
Supplement: NIHMS912562-supplement.pdf [file NIHMS912562-supplement.pdf]

Online Supplements to

**TFEB activation protects against cardiac proteotoxicity via increasing autophagic flux**

Bo Pan<sup>1</sup>, Hanming Zhang<sup>1</sup>, Taixing Cui<sup>2</sup>, Xuejun Wang<sup>1\*</sup>

<sup>1</sup>Division of Basic Biomedical sciences, University of South Dakota Sanford School of Medicine, Vermillion, SD 57069, USA

<sup>2</sup>Department of Cell Biology and Anatomy, University of South Carolina School of Medicine, Columbia, SC 29209, USA

Running title: TFEB protects against cardiac proteotoxicity

\*Correspondence: Dr. Xuejun Wang, Division of Basic Biomedical Sciences, Sanford School of Medicine of the University of South Dakota, Vermillion, SD 57069, USA. Telephone: 605 658-6345, Fax: 605 677-6381. E-mail: [xuejun.wang@usd.edu](mailto:xuejun.wang@usd.edu).

- I. Supplementary Tables 1 ~ 3.
- II. Supplementary Figures 1 ~ 8.

## I. Supplementary Tables 1 ~ 3.

**Supplementary Table1. Primers used for RT-PCR**

| Gene Name | Sequence (5'–3')                               |
|-----------|------------------------------------------------|
| CtsB      | TGGGTTCAGCGAGGACAT<br>ATGGTGTAGGGTAAGCAGCC     |
| CtsD      | GCGTCTTGCTGCTCATTCT<br>AACTCTGACACTGGCTCCTT    |
| Lamp1     | GTGGGACTTGCGGTGCC<br>GACATTGAGGGCGAGCG         |
| M6PR      | GGATAAGGAGTCAAAGAATG<br>TGATTCTCCAACCACCGT     |
| MCOLN1    | CGCCGCCGCCTCAAGT<br>GCTGCTCCCGTGTGTAGGC        |
| UVRAG     | CTTCTGGATACCTACTTCAC<br>GACTTTCCACTCTATCAACAGC |
| VPS18     | GCTCCGCATTGACTTGGG<br>GCCTTCTGTCCATTGCGGT      |
| RAB7A     | CAGTCTCTTGGTGTGGC<br>CGAAGTAAGGAATGTTG         |
| P62       | GCCACCTCTCTGATAGC<br>AGGTTTGCTGACTCCG          |
| BECN1     | TTACTTACCACAGCCCAGG<br>TGCTCCAACATCTCCAAC      |
| TFEB      | GGTGTGAAGGTGCAGTCC<br>GGGTAGCGTGTGGGCATCTG     |
| E-CryAB   | GGTGTGAAGGTGCAGTCC<br>GGGTAGCGTGTGGGCATCTG     |
| T-CryAB   | TTCTTCGGAGAGCACCTGTT<br>TCTGGGACGTCGTATGGGTA   |
| GAPDH     | ATGACATCAAGAAGGTGGTG<br>CATACCAGGAAATGAGCTTG   |

**Supplementary Table 2. Echocardiographic parameters of FVB/N mice at ~6 months of Age**

|                                                | NTG<br>(n=8) | CryAB <sup>R120G</sup> TG<br>(n=8) |
|------------------------------------------------|--------------|------------------------------------|
| Heart rate (bpm)                               | 473±25       | 336±26**                           |
| LV end-diastolic posterior wall thickness (mm) | 0.76±0.08    | 1.33±0.09**                        |
| LV end-diastolic volume (mm <sup>3</sup> )     | 77.69±5.59   | 64.82±7.15**                       |
| LV Ejection Fraction (EF, %)                   | 57.47±4.61   | 54.27±10.53                        |
| LV Fractional Shortening (FS, %)               | 29.98±3.07   | 28.00±6.71                         |
| Stroke Volume (SV, µl)                         | 44.6±3.7     | 34.8±6.2**                         |
| Cardiac Output (CO, ml/min)                    | 21.2±2.2     | 12.0±2.2**                         |
| Estimated LV Mass (mg)                         | 99.2±16.4    | 192.3±20.3**                       |

LV, left ventricle; TG, transgenic; NTG, non-TG; \*\* $p < 0.01$  vs. NTG; Student's *t*-tests. Mean ± STD

**Supplementary Table 3. Gravimetric analysis of FVB/N mice at ~6 months of Age**

|                                    | NTG<br>(n=6) | CryAB <sup>R120G</sup> TG<br>(n=6) |
|------------------------------------|--------------|------------------------------------|
| Heart Weight (mg)                  | 122.2±15.8   | 212.2±14.0**                       |
| Tibial Length (mm)                 | 18.6±0.9     | 18.7±0.6                           |
| Heart weight/Tibial length (mg/mm) | 6.57±0.73    | 11.36±0.61**                       |

\*\* $p < 0.01$  vs. NTG; Student's *t*-tests. Mean ± STD

## II. Supplementary Figures 1 ~ 8

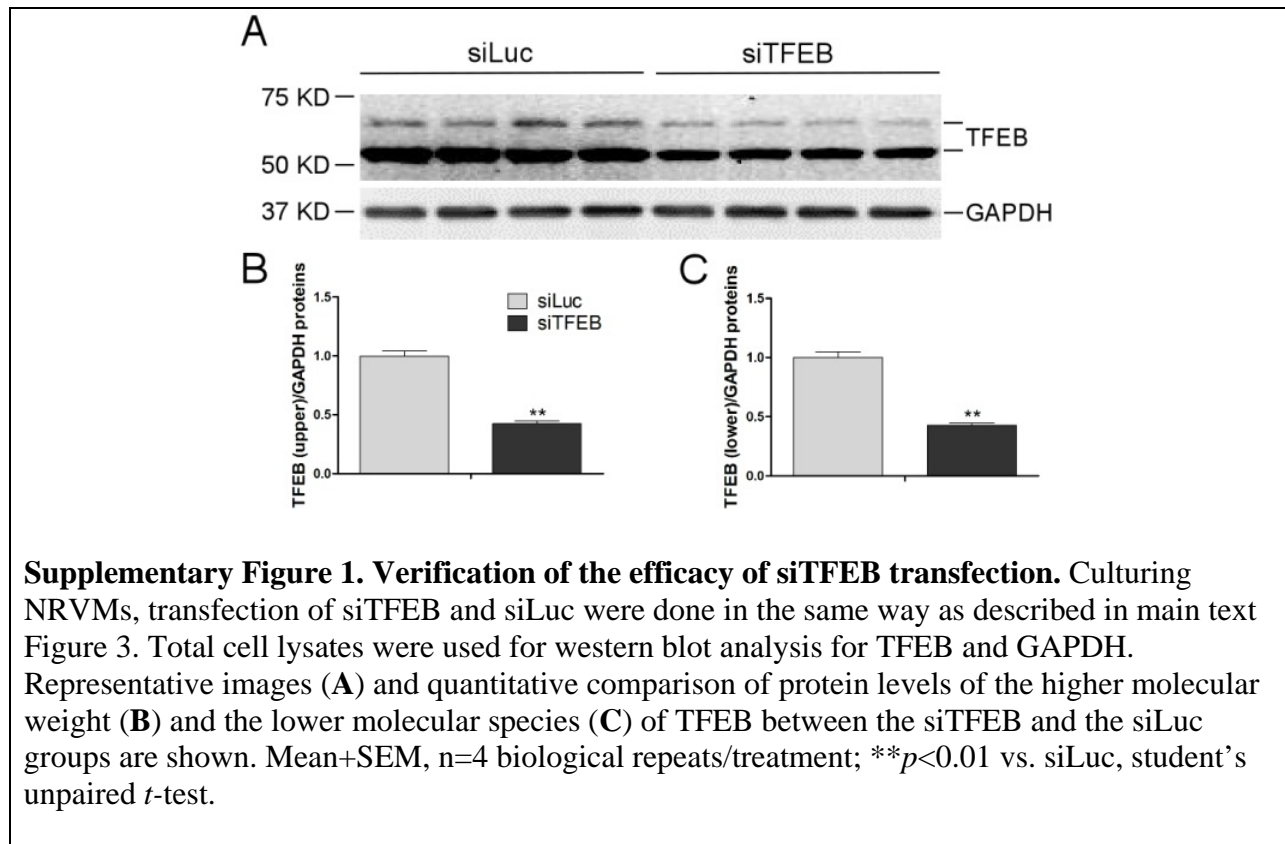

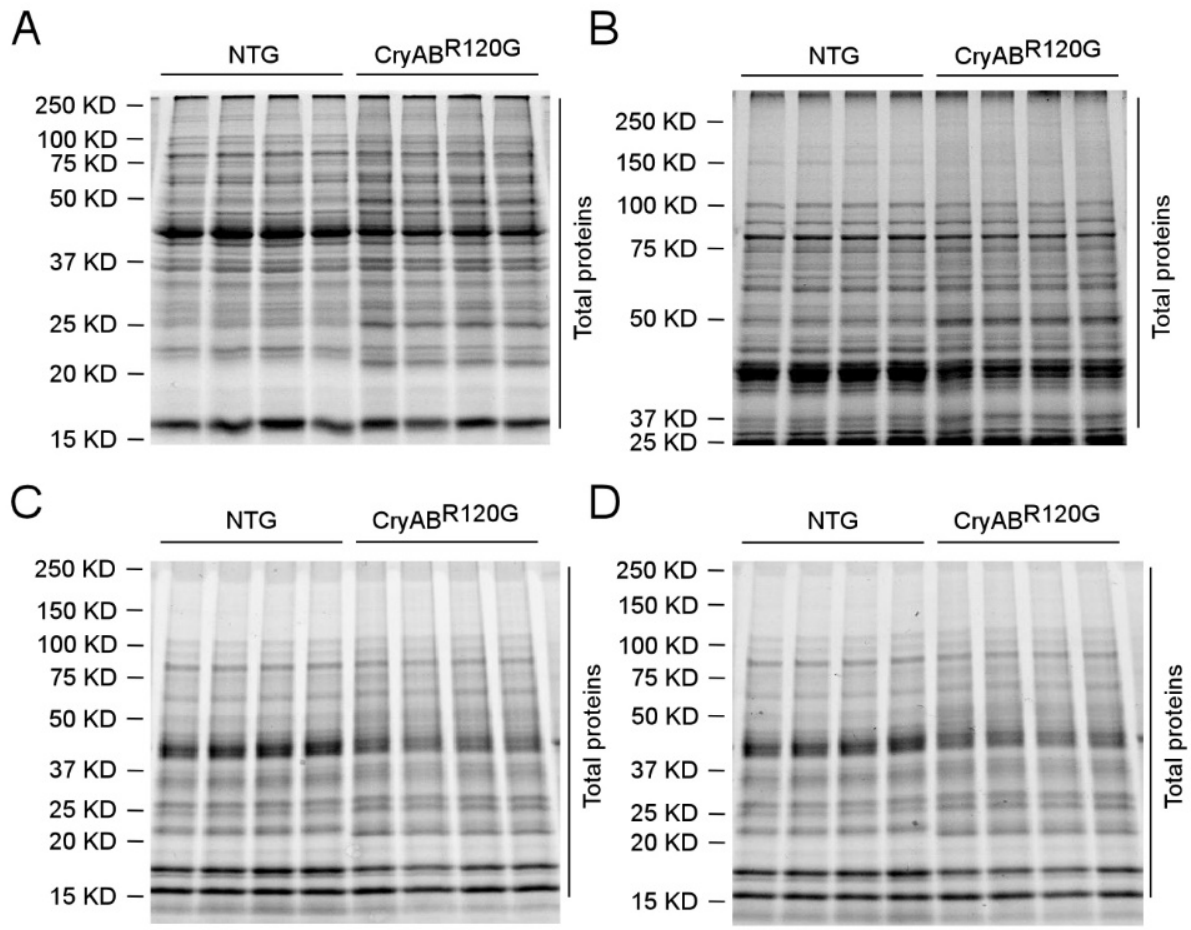

**Supplementary Figure 2. Stain-free total protein images of the gels used for the western blot analyses presented in Figure 2D (mTORC1 activation) of the main text.** Panel **A** was from a 12% gel, **B** from an 8% gel and both **C** and **D** were from 4% to 20% gradient gels. Gels **A** and **D** were used for 4E-BP1 and p-4E-BP1, respectively. Gel **B** was for mTOR and p70 S6 kinase, and Gel **C** was for phospho-mTOR and phospho-p70 S6 kinase.

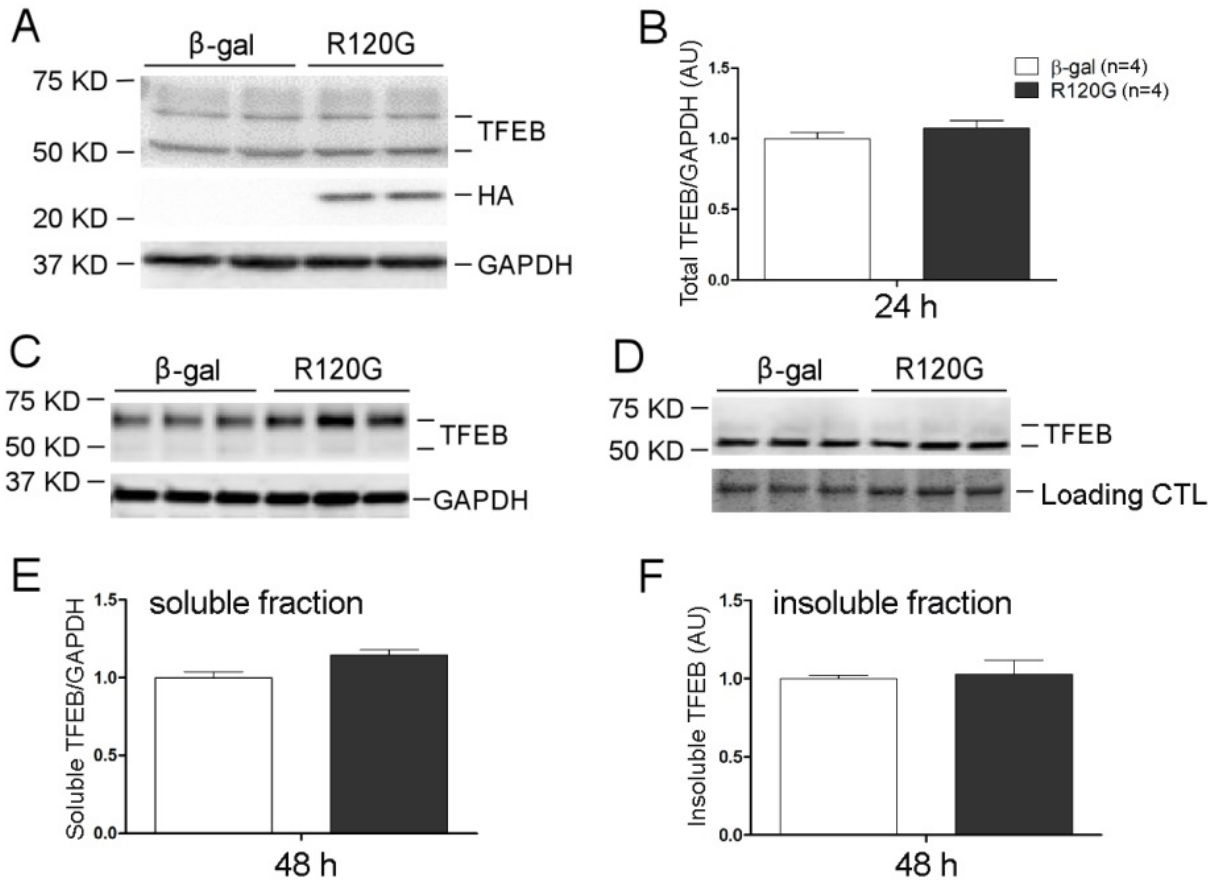

**Supplementary Figure 3. The effect of CryAB<sup>R120G</sup> overexpression on protein expression of TFEB proteins in cultured cardiomyocytes.** **A** and **B**, Western blot analyses for the indicated proteins in the total cell lysates from cultured NRVMs at 24 h after Ad-β-gal or Ad-HA-CryAB<sup>R120G</sup> (R120G) infection. Overexpression of HA-CryAB<sup>R120G</sup> was confirmed by the immunoblot for HA-tagged protein (middle image in **A**). Representative images (**A**) and pooled densitometry data of two major TFEB bands (**B**) are shown. N=4 biological repeats/treatment. **C** ~ **F**, Western blot analyses for the indicated proteins in the soluble (**C**, **E**) and insoluble (**D**, **F**) fraction of cultured NRVMs at 48 h after Ad-β-gal or Ad-HA-CryAB<sup>R120G</sup> infection. Note that CryAB<sup>R120G</sup> overexpression displayed no discernible effect on the expression of TFEB proteins in cultured cardiomyocytes. Mean+SEM, N=3 biological repeats/treatment.  $p>0.05$  for all comparisons between the β-gal and the R120G groups at both 24 h and 48 h time points.

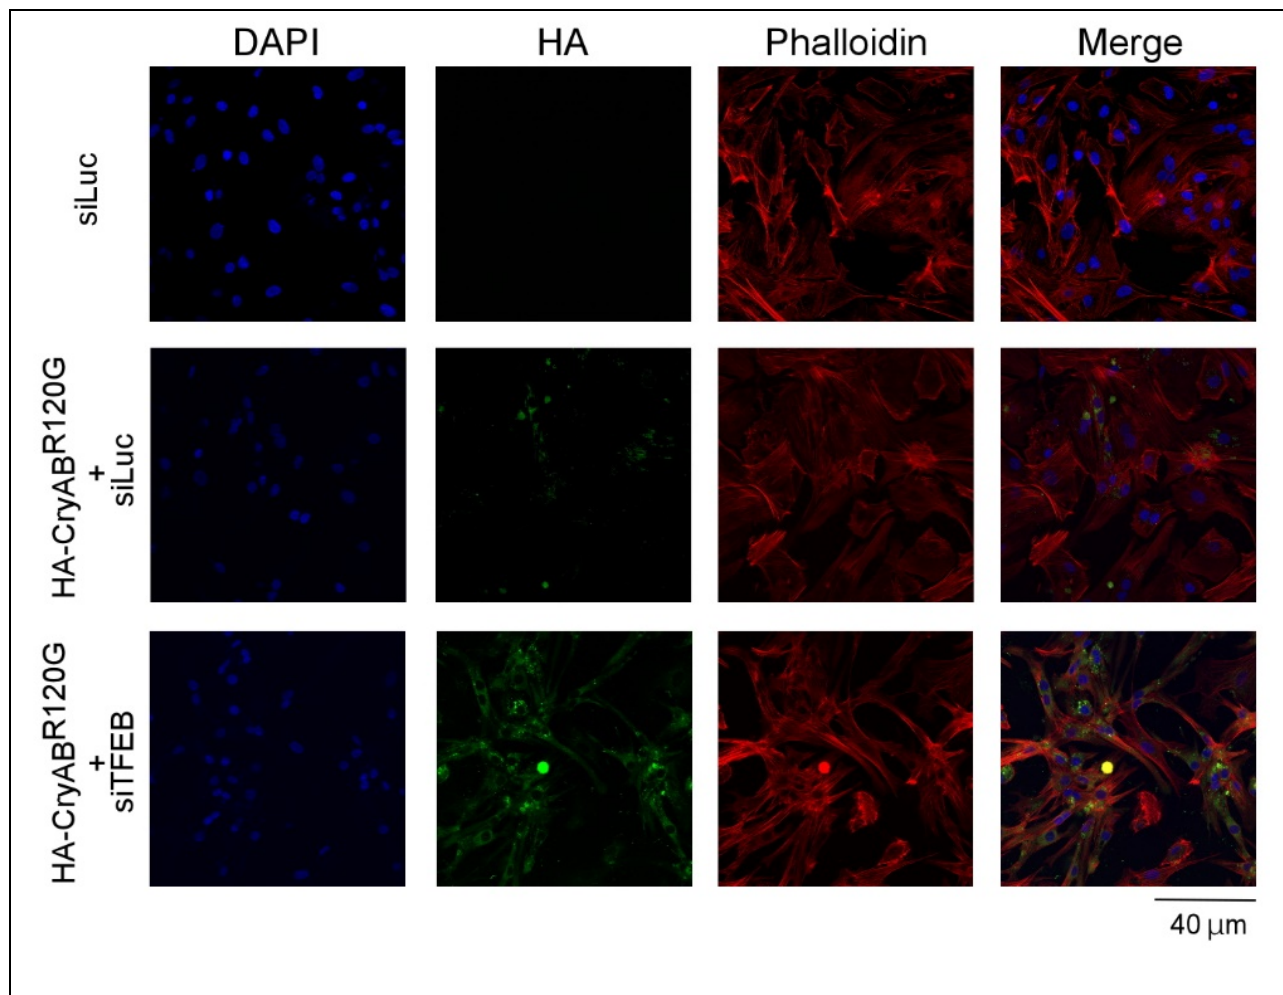

**Supplementary Figure 4. Downregulation of TFEB exacerbates the accumulation of aberrant protein aggregates in NRVMs expressing CryAB<sup>R120G</sup>.** Culturing NRVMs, transfection of siTFEB and siLuc, and infection of Ad-HA-CryAB<sup>R120G</sup> were done in the same way as described in main text Figure 3. And the cell fixation, fluorescence staining, and confocal microscopy were all performed as described for main text Figure 5.

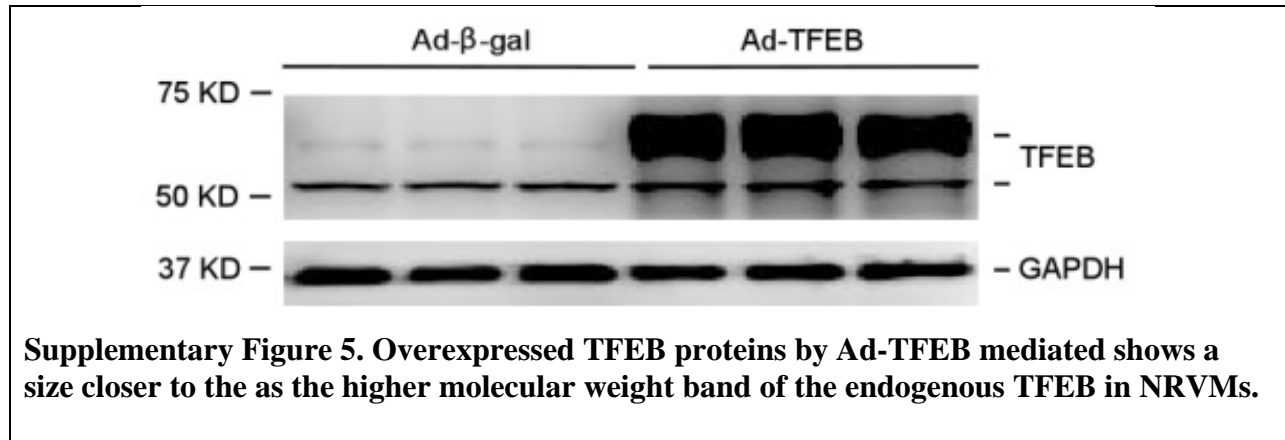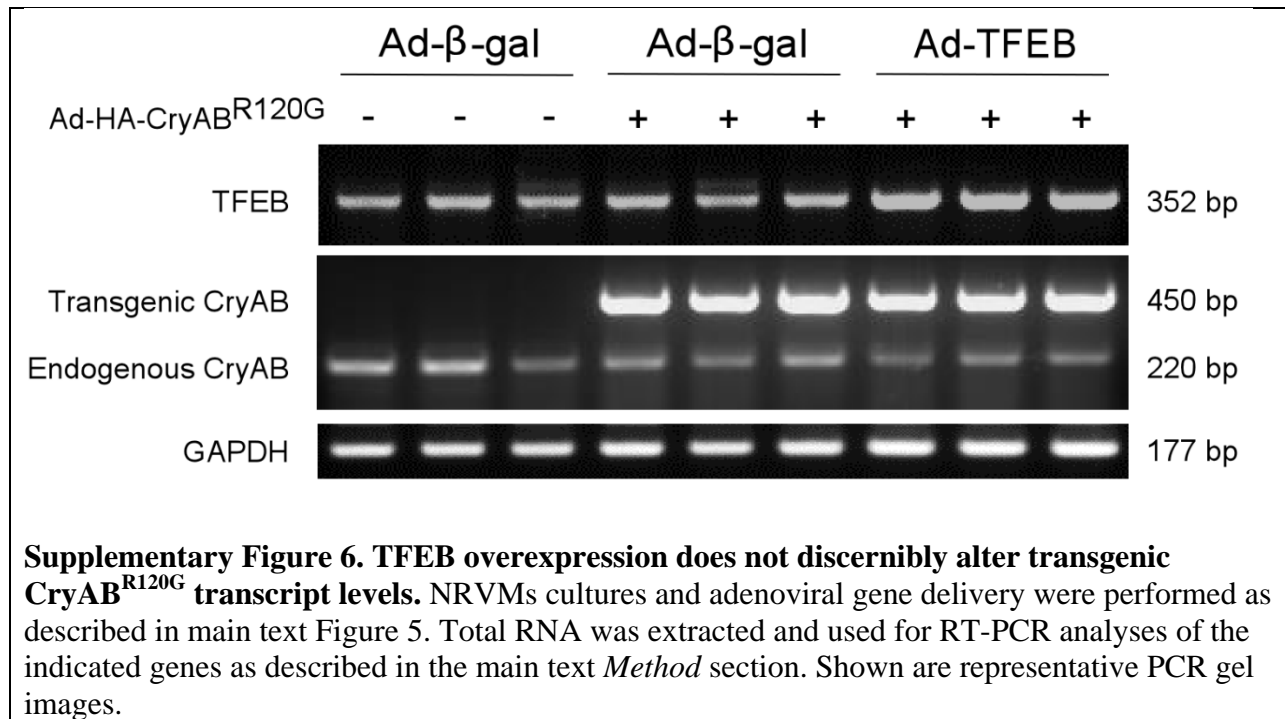



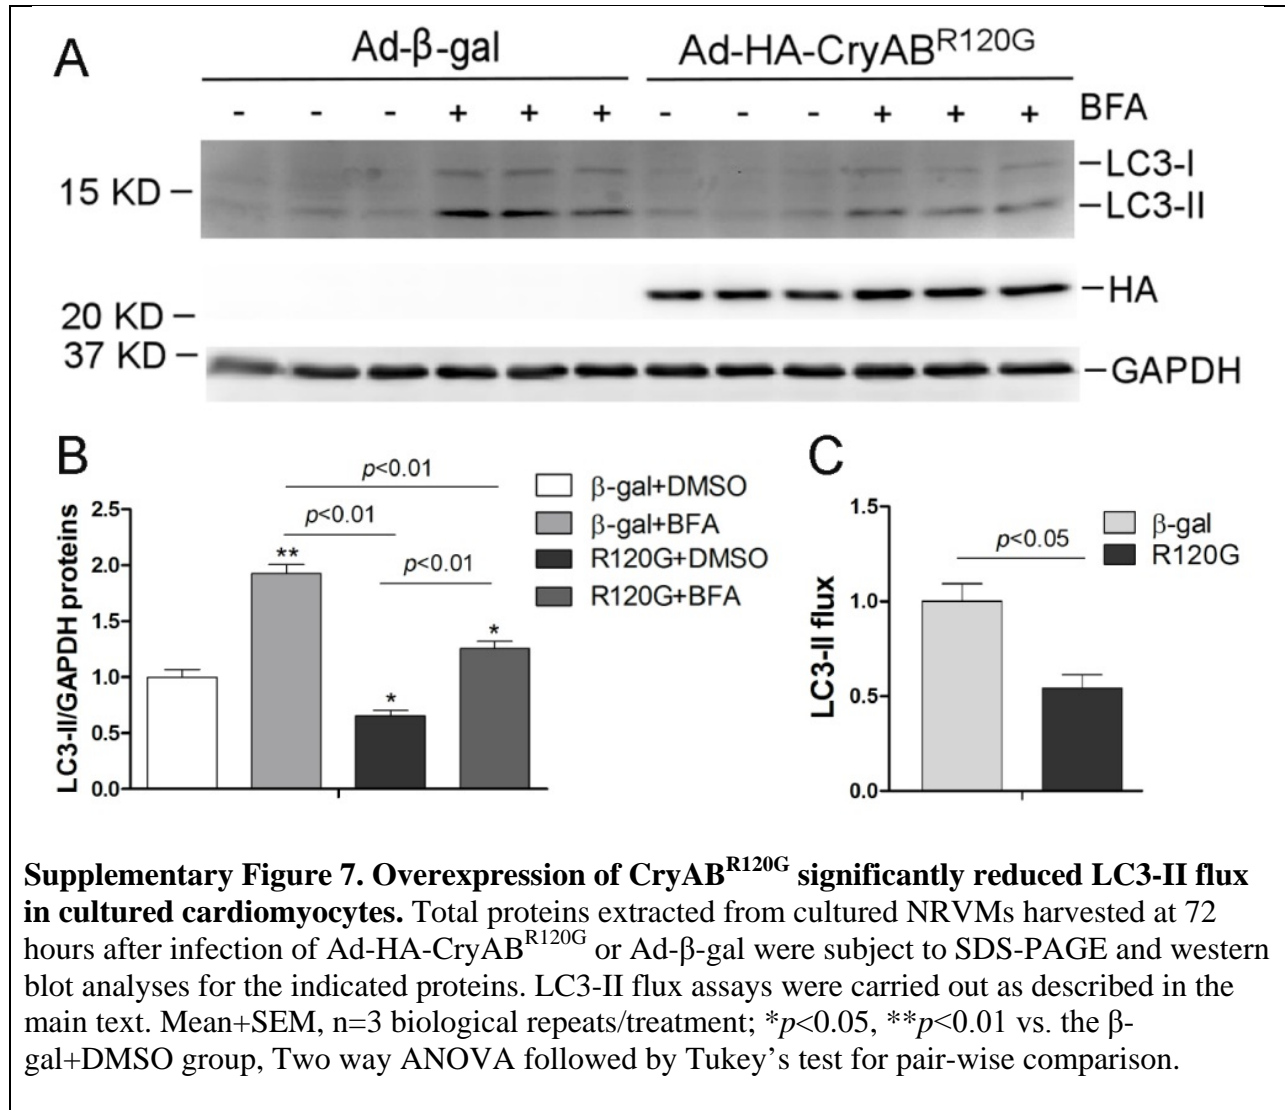

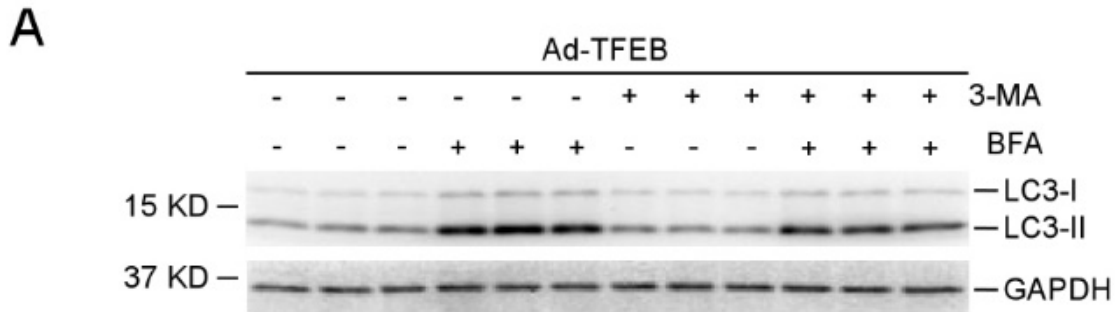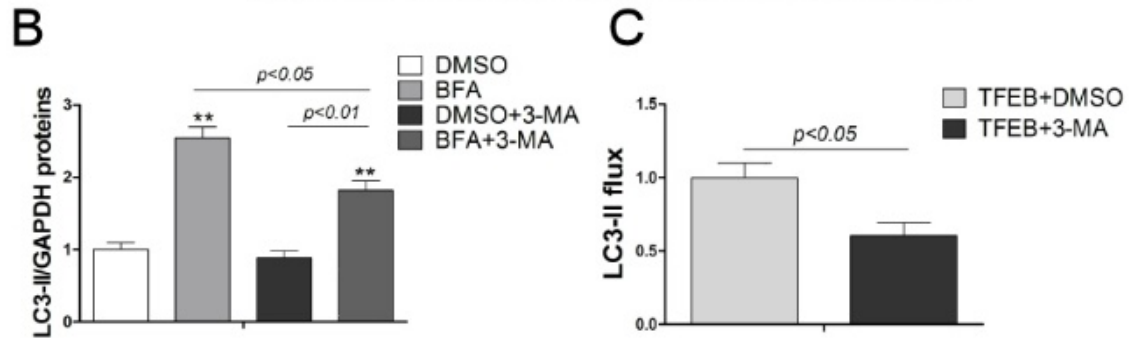

**Supplementary Figure 8. 3-MA is capable of suppressing autophagic flux in presence of TFEB overexpression.** NRVMs were infected with Ad-HA-CryAB<sup>R120G</sup> at 24 hours before they were treated with 3-MA (2.5 mM) for 12 hours, and then the cells were treated with BFA (6 nM) or vehicle control (DMSO) and harvested 24 hours later for extraction of total proteins. Western blot images (A), pooled LC3-II densitometry data (B), and the LC3-II flux (C) are presented. \*\* $p < 0.01$  vs. the DMSO group. Two way ANOVA followed by Tukey's test for pair-wise comparison.
